# Supplementary material for: Regional gene expression signatures are associated with sex-specific functional connectivity changes in depression
Source: PubMed Central journal article supplement (PMC9519925; doi:10.1038/s41467-022-32617-1), 2022-09-28
Supplement: 41467_2022_32617_MOESM1_ESM.pdf [file 41467_2022_32617_MOESM1_ESM.pdf]

# **Regional gene expression signatures are associated with sex-specific functional connectivity changes in depression**

Aleksandr Talishinsky, Jonathan Downar, Petra E. Vértes, Jakob Seidlitz, Katharine Dunlop, Charles J. Lynch, Heather Whalley, Andrew McIntosh, Fidel Vila-Rodriguez, Zafiris J. Daskalakis, Daniel M. Blumberger, Conor Liston

## **Supplementary Material**

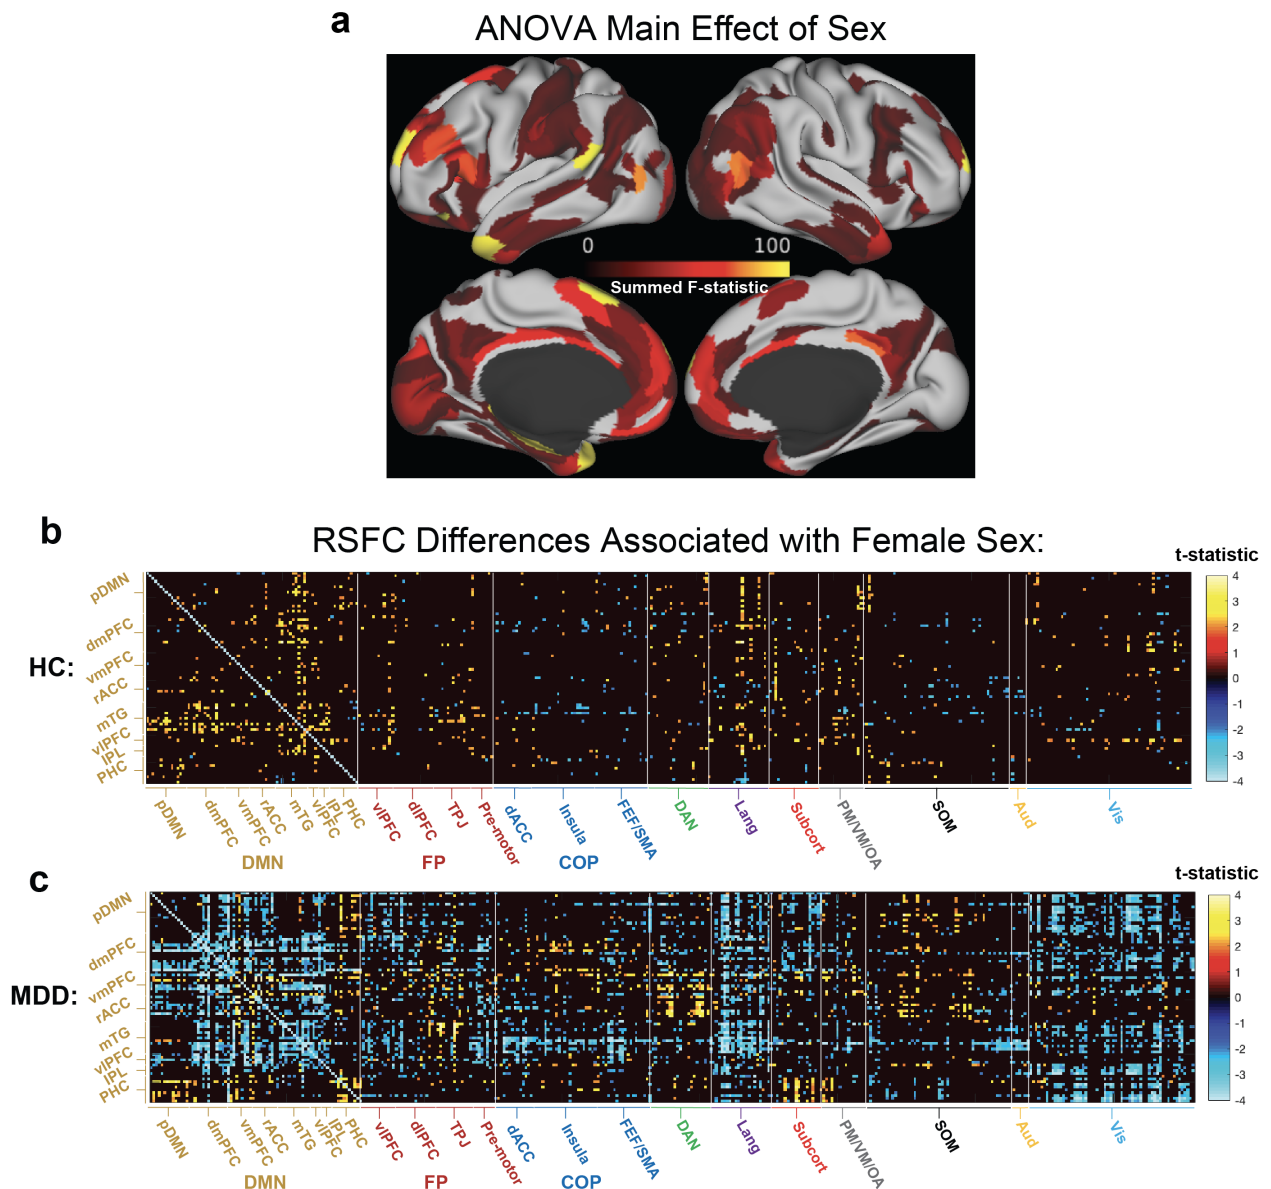

**Supplementary Figure 1. ANOVA Main Effect of Sex.** **a.** Summed one-way ANOVA F-statistics representing main effect of sex on rsFC with 77 default mode network (DMN) ROIs for each of 360 HCPMM1 ROIs plotted on a brain surface. All effects plotted are significant with FDR  $q < 0.05$ . **b.** Significant (unadj.  $p < 0.05$ ) t-statistics representing rsFC effects associated with female sex in healthy subjects. **c.** Significant (unadj.  $p < 0.05$ ) t-statistics representing rsFC effects associated with female sex in subjects with MDD.

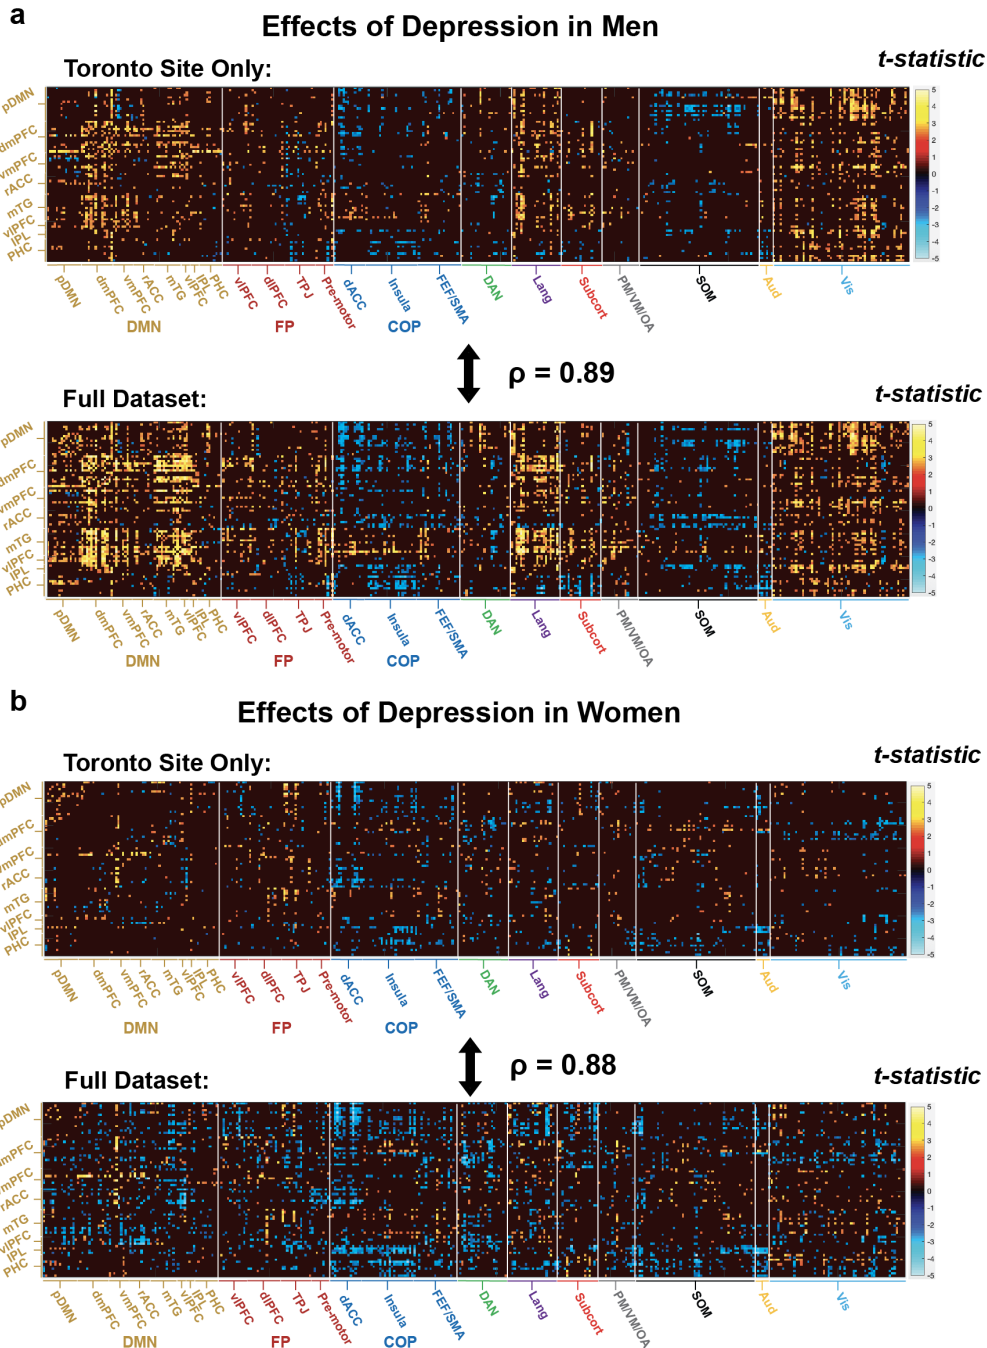

**Supplementary Figure 2. Two-tailed t-test Results Pre- and Post- ComBat Harmonization.** To ensure that the ComBat Harmonization technique was not introducing significant artifactual effects in our analysis, we compared the results of (a) male and (b) female MDD vs healthy control t-tests at each of 26,180 unique connectivity features between 77 DMN nodes (in rows) and 360 HCPMM1 and 19 freesurfer subcortical regions (in columns) before ComBat harmonization (top panels) using only subjects from the Toronto dataset ( $n=148$  male MDD,  $n=33$  male HC,  $n=223$  female MDD,  $n=52$  female HC) who were scanned in the same scanner with the same protocol, and after ComBat Harmonization using 553 subjects from two sites. Pre- and post- ComBat harmonization t-statistics were correlated over 26,180 connectivity features in each sex, resulting in Pearson correlations of 0.89 for males, and 0.88 for females, indicating a high degree of concordance in the direction of MDD-related effects. Qualitatively, sex-specific results highlighted in this paper, including male-specific DMN hyperconnectivity, are present regardless of ComBat harmonization.

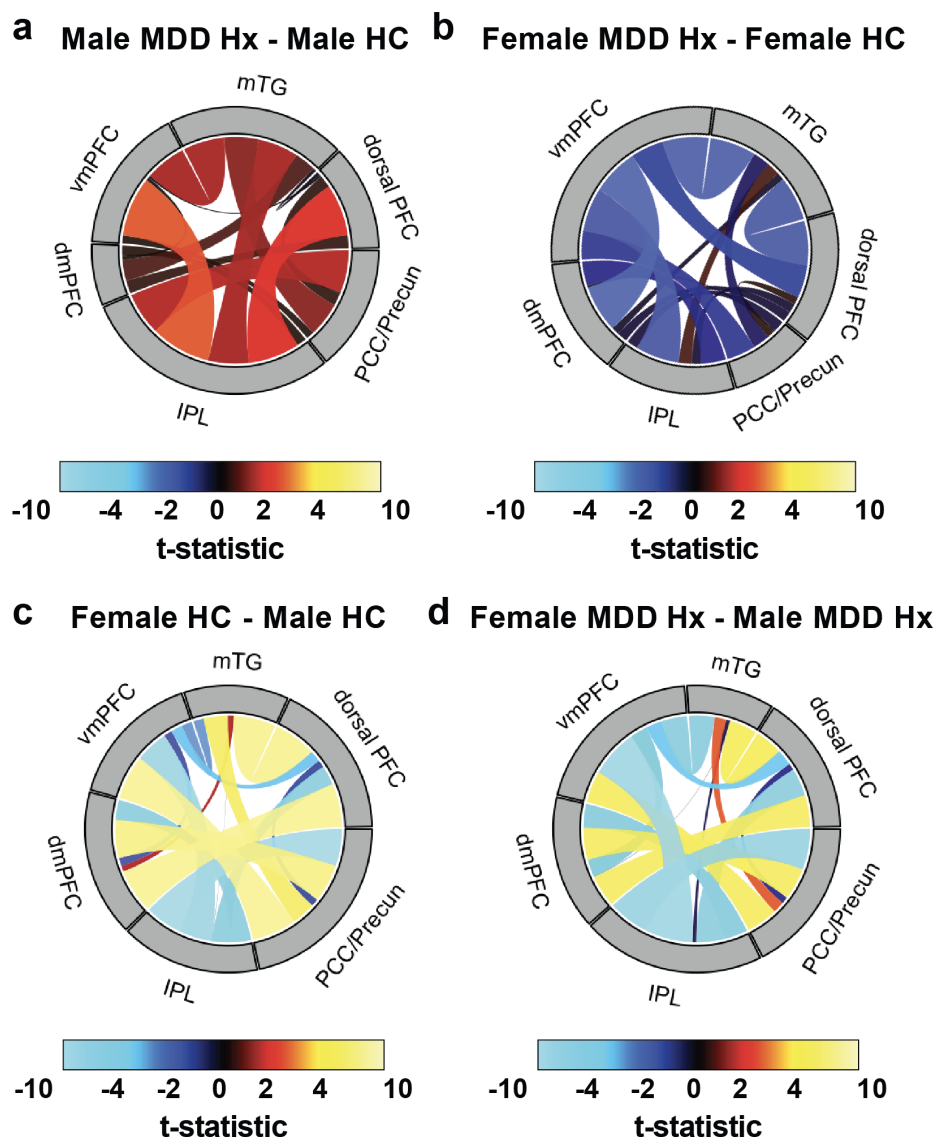

**Supplementary Figure 3. Effects of MDD history and sex on DMN rsFC in UK Biobank subjects.** Plots depicting rsFC between ICA-nodes restricted to DMN regions, described in Fig. 2f, in four groups of UK BioBank subjects: Male MDD Hx, males with a probable history of MDD (n=537); Male HC, healthy males (n=1907); female MDD Hx, females with a probable history of MDD (n=921); female HC, healthy females (n=1773). Warm colors denote increased connectivity in subjects with probable MDD history compared to controls (**a-b**) or in women compared to men (**c-d**).

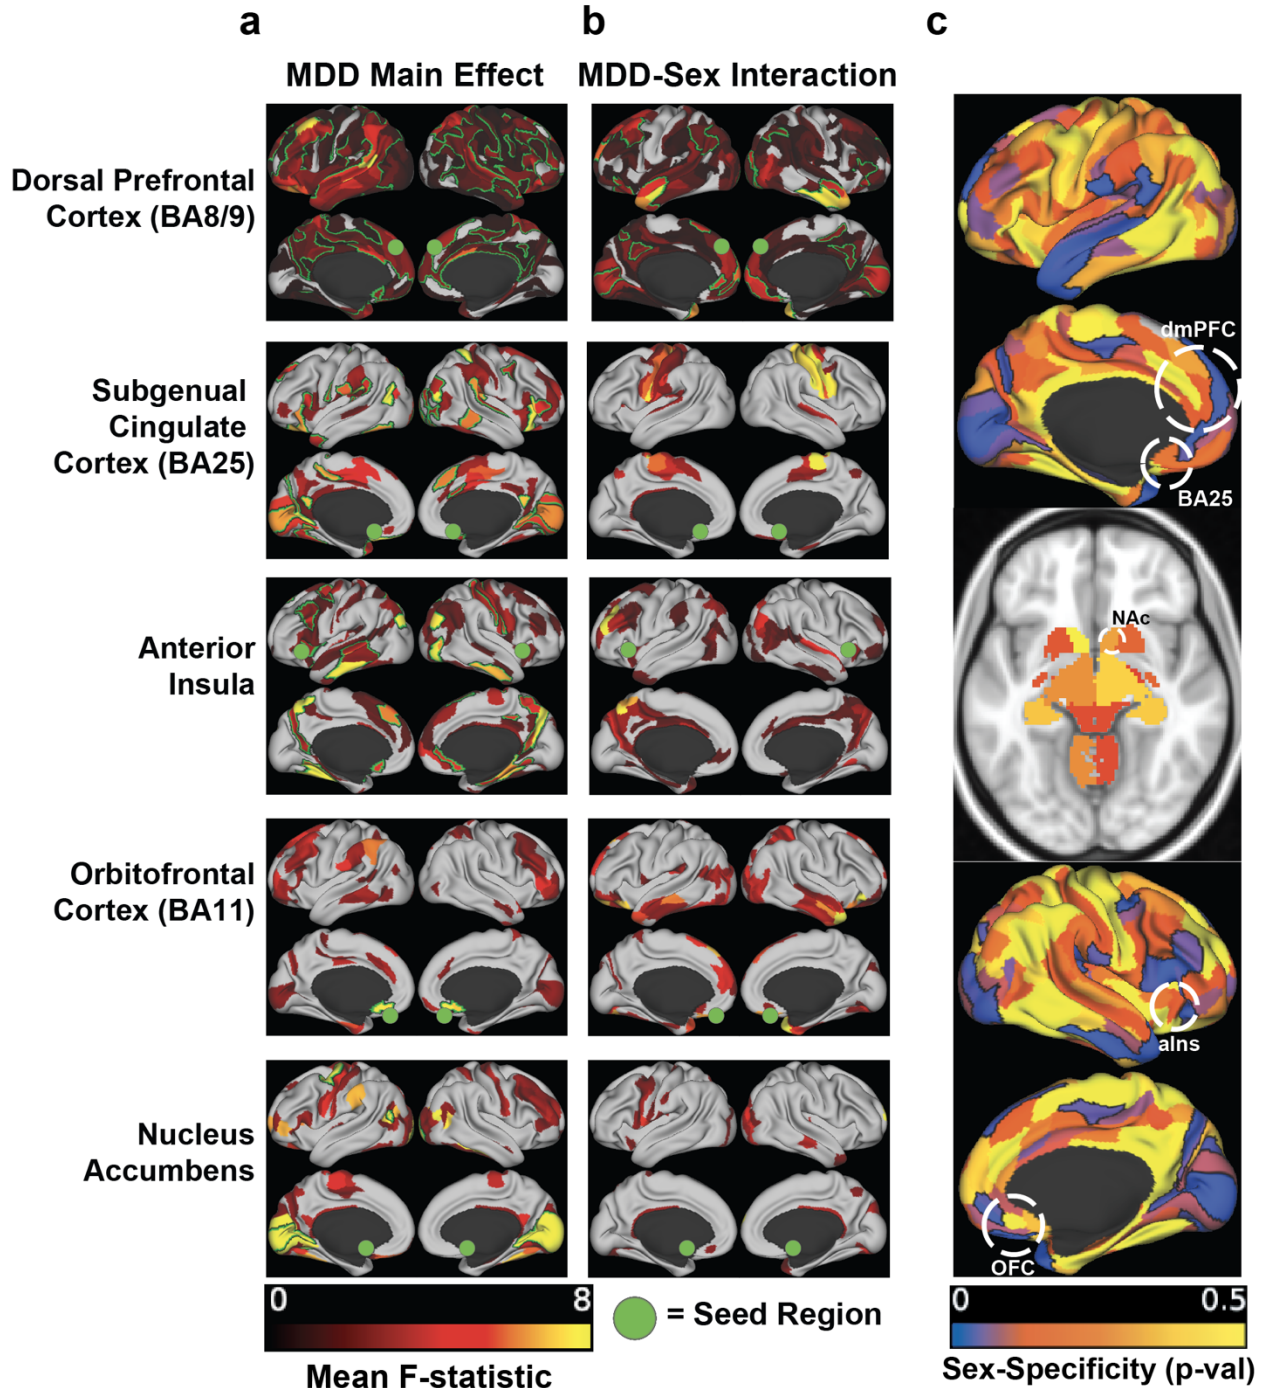

**Supplementary Figure 4. Sex-specific rsFC effects at five transcriptionally-defined ROIs. a-b.** For a given seed region (green circles, labeled in rows), two-way ANOVA (factors = MDD status, sex,  $n=553$ ) was performed at each rsFC feature associated with a brain parcel within that seed region, and F-statistics representing significant ( $p < 0.05$ ) (a.) main effects of MDD and (b.) MDD-sex interaction effects were meaned over brain parcels participating in each seed region and plotted on a brain surface. Regions with  $FDR\ q < 0.05$  effects are outlined in green. c. Brain spatial map of p-values representing the percentile of the correlation between male and female depression effects on rsFC (t-stat via two-tailed t-test) in a null distribution of 1,000 correlations of depression effects on rsFC between two randomly assigned subgroups of subjects (i.e. not aligned with sex). Male-female correlations below the fifth percentile ( $p < 0.05$ ) are highlighted by black borders.

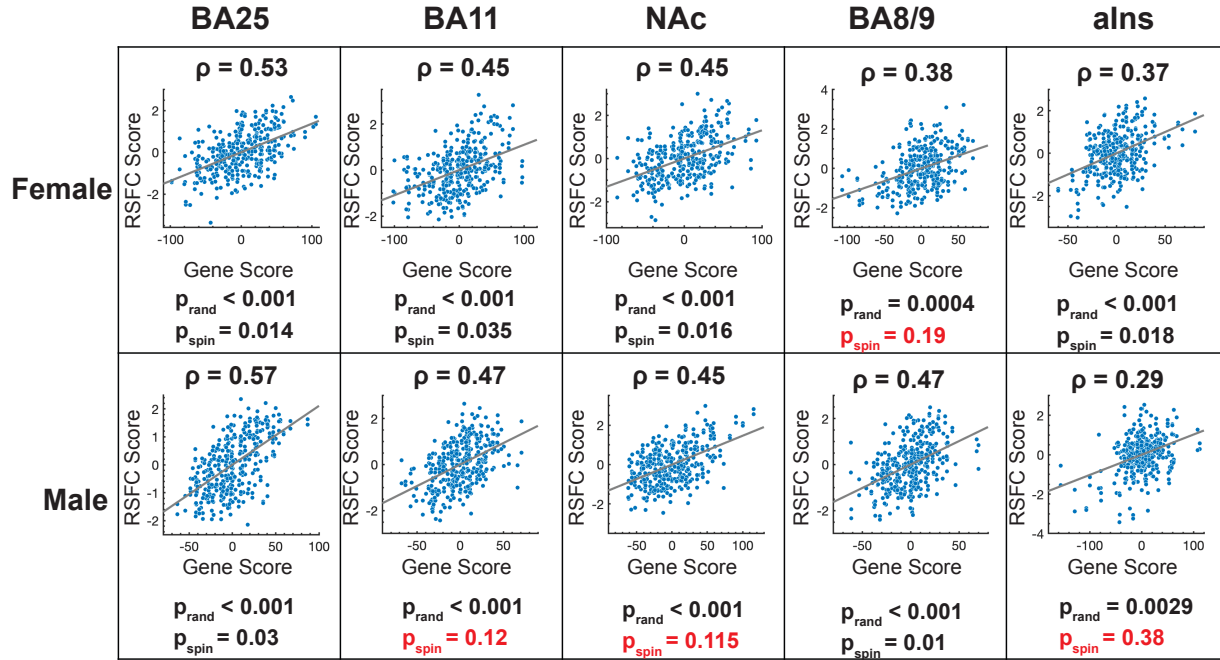

**Supplementary Figure 5. Gene-Neuroimaging Partial Least Squares Regression Score Correlations.** For 10 PLS-R models at five seed regions (columns) in females (top panels) and in males (bottom panels), Pearson correlation coefficients between PLS-R component loading scores are shown above scatter-plots indicating how well PLS-R Gene component scores (x-axes) can predict MDD effects on rsFC (y-axes). Each dot in the scatter plot represents a cortical region in the HCPMM1 parcellation. Significance was assessed for each of the 10 PLS-R models using both a random spatial permutation test and a random spatial rotation “spin” test (described in Methods). Associated p-values ( $p_{\text{rand}}$  and  $p_{\text{spin}}$ , respectively) are plotted below each scatter plot, with non-significant p-values in red. All p-values are adjusted for multiple comparisons using the Benjamini-Hochberg FDR correction approach (see Methods).

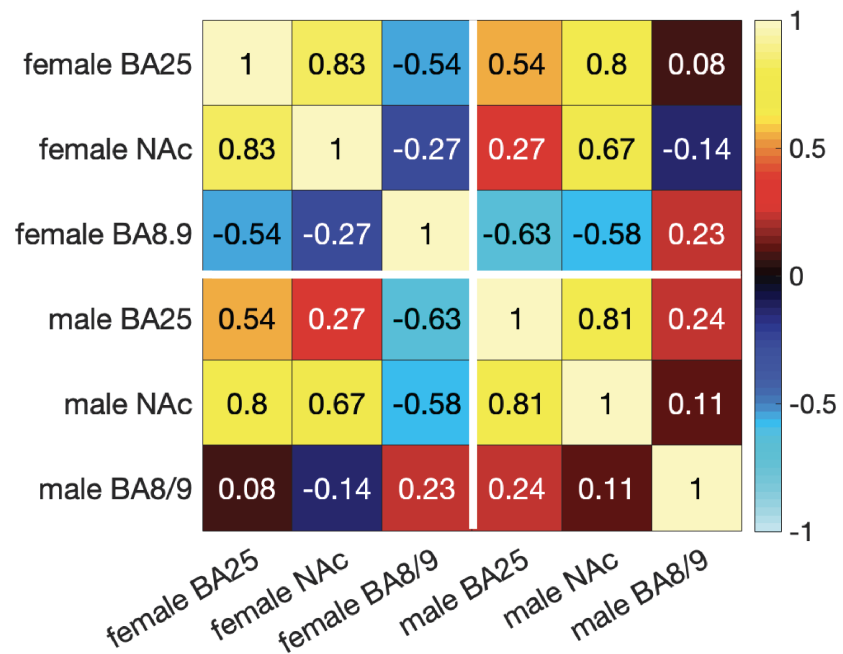

**Supplementary Figure 6. Spearman correlation of loading weights across 21,120 genes in six PLS models from (Fig. 4f-g).**

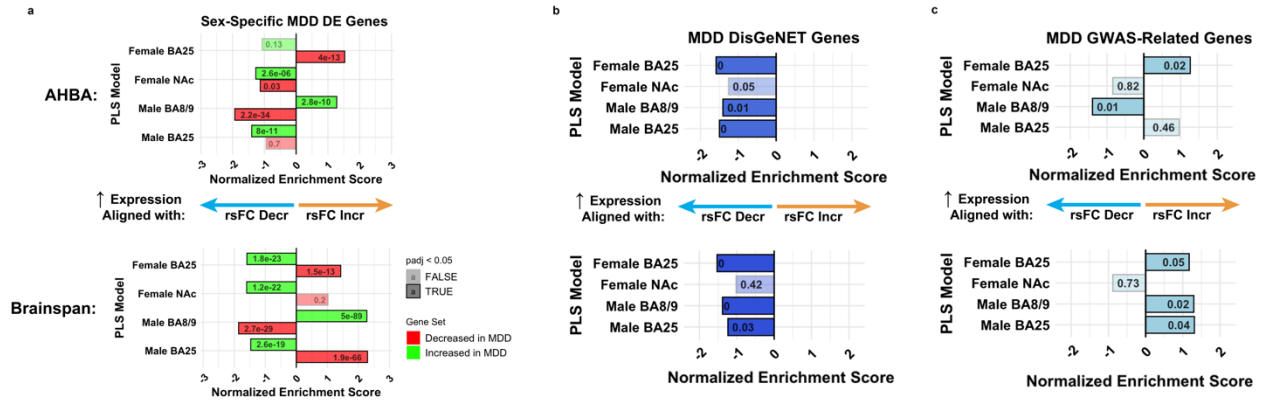

**Supplementary Figure 7. PLS-R Models trained on AHBA and Brainspan gene expression data show convergent results on enrichment of depression-related gene sets. a.** fGSEA results for differentially expressed genes in depression using loading weight-ranked gene lists derived from PLS analysis with gene predictors derived from AHBA (top) and Brainspan (bottom) datasets. In all four PLS models shown, genes predicting the spatial distribution of connectivity abnormalities in MDD are enriched for genes that show increased (green) or decreased (red) expression in brain tissue donated by MDD subjects of the corresponding sex. fGSEA-generated normalized enrichment scores (x-axis), p-values (plotted in each bar), and adjusted p-values (darkened bar color if FDR  $q < 0.05$ ) are plotted. Negative enrichment scores denote enrichment among genes with negative LWs in the PLS regression model, and positive enrichment scores denote enrichment among genes with positive LWs. **b.** fGSEA results for depression-related risk genes as defined in the DisGeNet database using loading weight-ranked gene lists derived from PLS analysis in AHBA (top) and Brainspan (bottom) datasets. **c.** fGSEA results for genes whose nervous tissue expression is modulated by significant SNPs from the most recent large-scale GWAS for depression using loading weight-ranked gene lists derived from PLS analysis in AHBA (top) and Brainspan (bottom) datasets. Full listing of genes in all gene sets can be found in Supplementary Table 3.



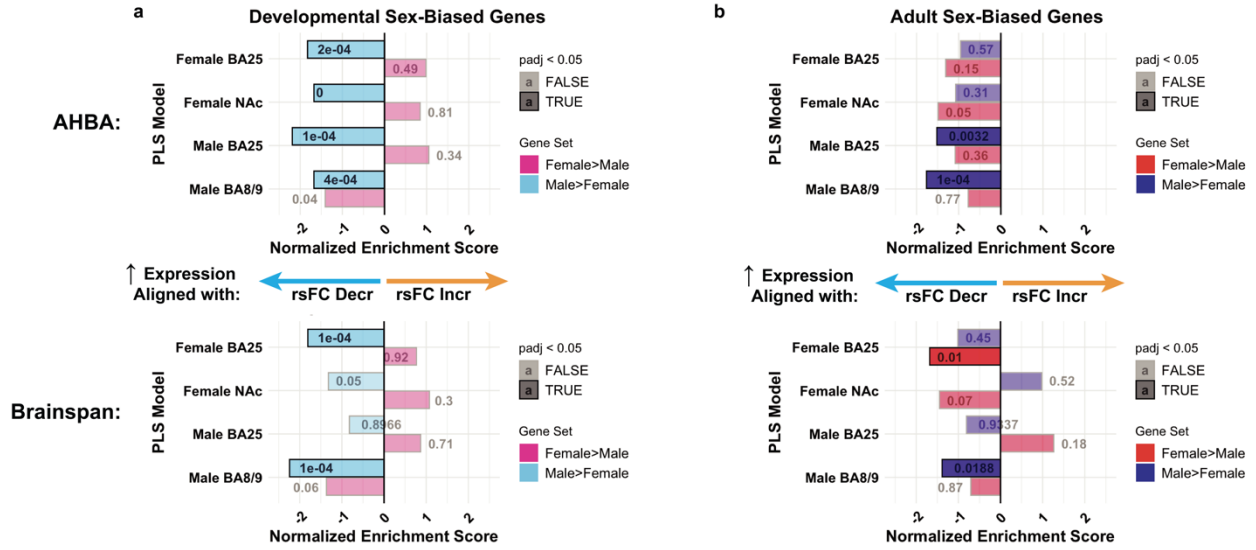

**Supplementary Figure 8. PLS-R Models trained on AHBA and Brainspan gene expression data show convergent results on enrichment of sex-biased gene sets.** **a.** fGSEA results for genes differentially expressed between males and females during development<sup>1</sup> (i.e. 4 post-conception weeks – 20 years old) using loading weight-ranked gene lists derived from PLS analysis with gene predictors derived from AHBA (top) and Brainspan (bottom) datasets. In all four PLS models shown, genes predicting the spatial distribution of connectivity abnormalities in MDD are enriched for genes that show decreased (light blue) expression in brain tissue donated by female subjects in one or both datasets. fGSEA-generated normalized enrichment scores (x-axis), p-values (plotted in each bar), and adjusted p-values (darkened bar color if FDR  $q < 0.05$ ) are plotted. Negative enrichment scores denote enrichment among genes with negative LWs in the PLS regression model, and positive enrichment scores denote enrichment among genes with positive LWs. **b.** fGSEA results for genes differentially expressed between males and females during adulthood<sup>2</sup> (i.e. >20 years old) using loading weight-ranked gene lists derived from PLS analysis in AHBA (top) and Brainspan (bottom) datasets. Full listing of genes in all gene sets can be found in Supplementary Table 3.

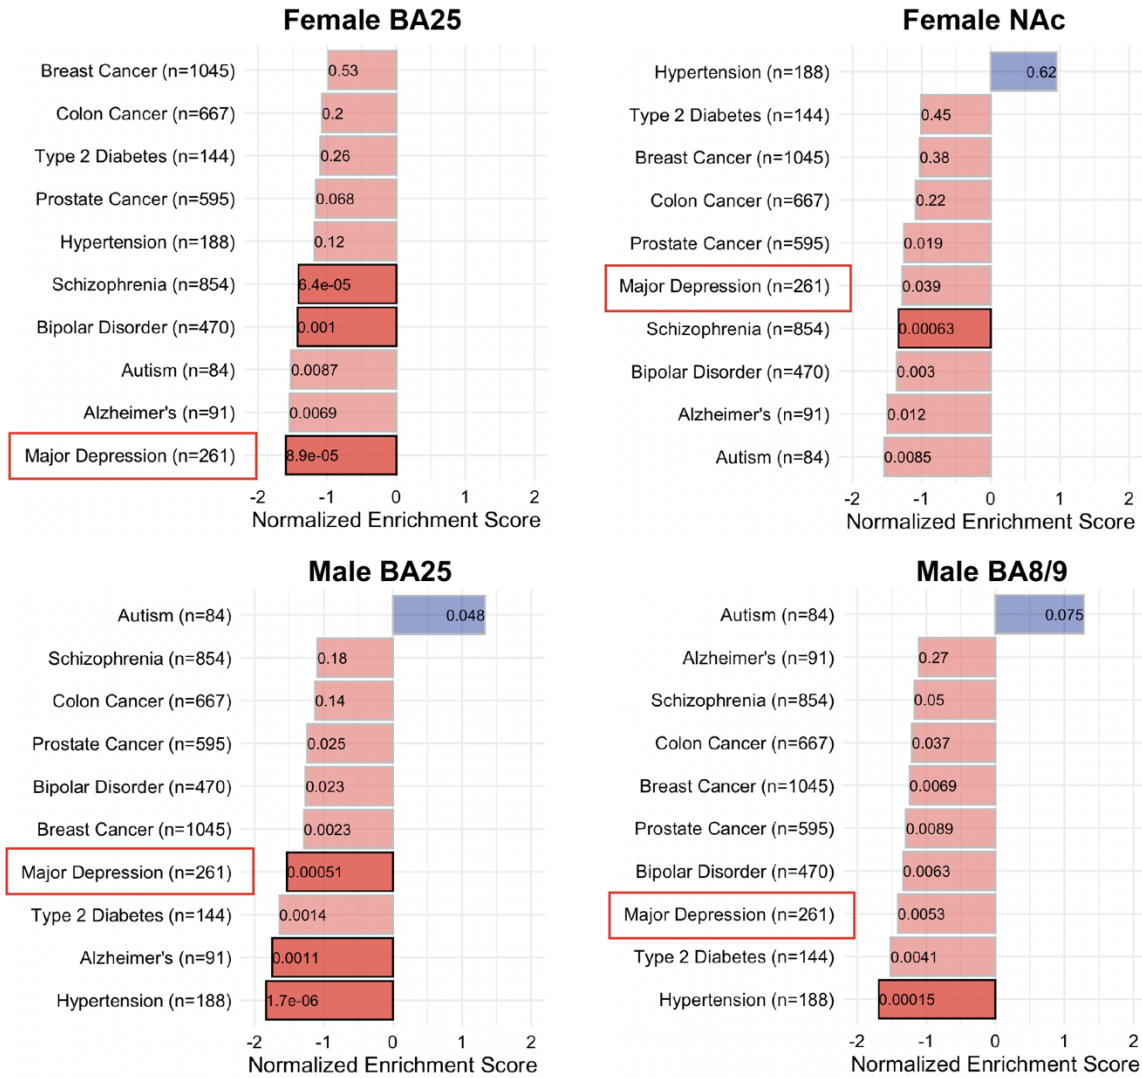

**Supplementary Figure 9. PLS-R Models trained on AHBA gene expression data show enrichment of gene sets related to depression, neuropsychiatric disorders, and hypertension.** fGSEA results for disease-related genes for 10 diseases (in rows of each panel) defined in the DisGeNet database using loading weight-ranked gene lists derived from PLS models trained on AHBA gene expression data to predict depression-related connectivity changes in females at the BA25 seed (top left), in females at the NAc seed (top right), in males at the BA25 seed (bottom left), in males at the BA8/9 seed (bottom right). Horizontal bars depict fGSEA normalized enrichment scores for each gene set in loading-weight-ranked gene lists from each PLS model. Raw fGSEA p-values for each gene set in each PLS model are depicted inside horizontal bars. Gene sets that were significantly enriched after Bonferroni correction (adjusted  $p < 0.05$ ) are highlighted with bolded horizontal bars.

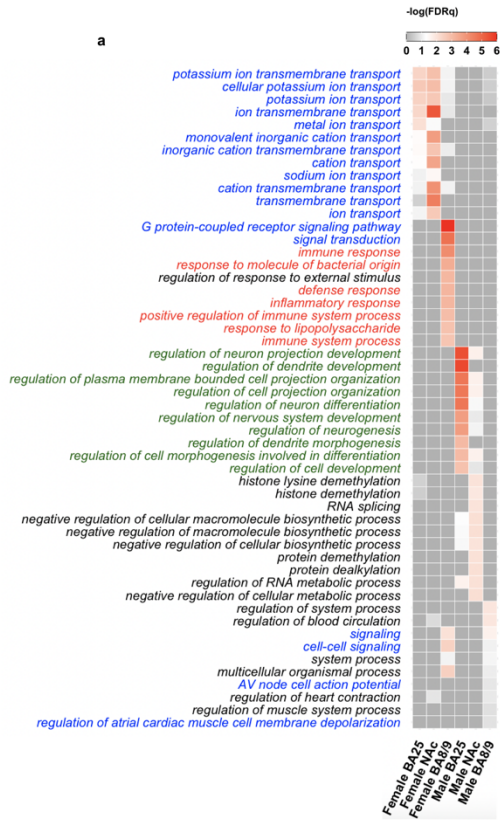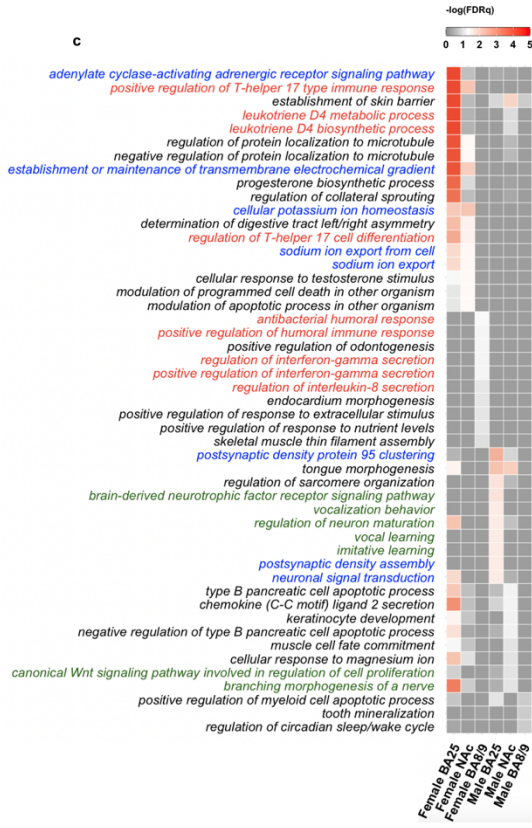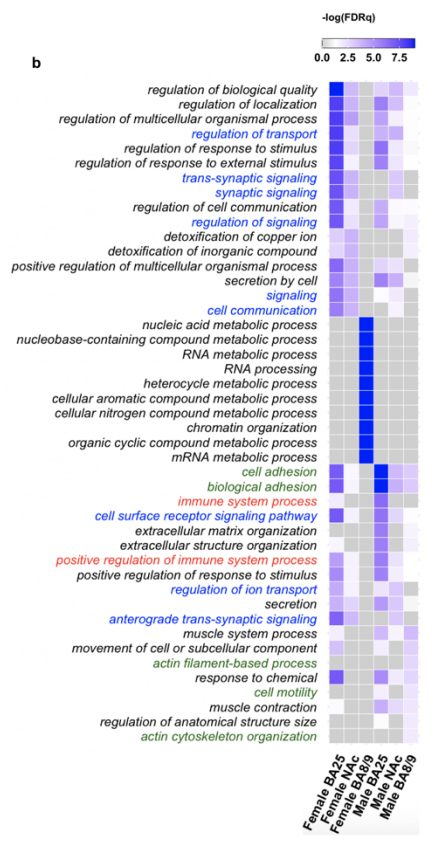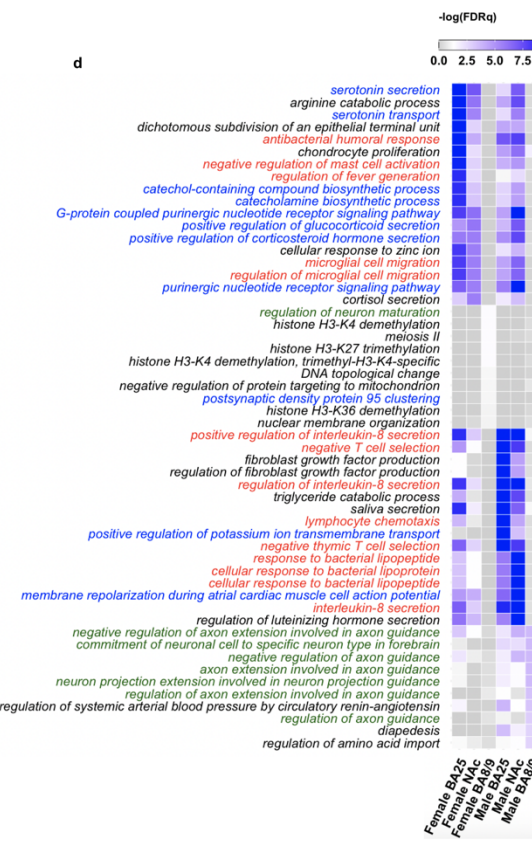

■ Neuronal signaling
 ■ Neurodevelopment
 ■ Immune function

**Supplementary Figure 10. Over-representation of Gene Ontologies in Highly Significant PLS-R Models Across Both Sexes.** Top 10 most significant Gene Ontology Biological Process terms enriched among the **(a,c)** most positively- and **(b,d)** most negatively-weighted genes from the six PLS models from **(Fig. 4f-g)**. FDR q-values representing significance of enrichment of genes from a given GO term in a given loading weight-ranked gene list are plotted in colors, with grey-to-white gradients representing q-values >0.05 and white-to-red or white-to-blue gradients representing significant q-values <0.05. GO enrichment analyses were carried out using two techniques to test for convergent enrichments: GOrilla (<http://cbl-gorilla.cs.technion.ac.il/>) **(a-b)** and a spatial brain permutation null phenotype<sup>3</sup> **(c-d)**. GO terms were manually colored by their involvement in 3 broad categories: neuronal signaling (blue), neurodevelopment (green), and immune function (red).

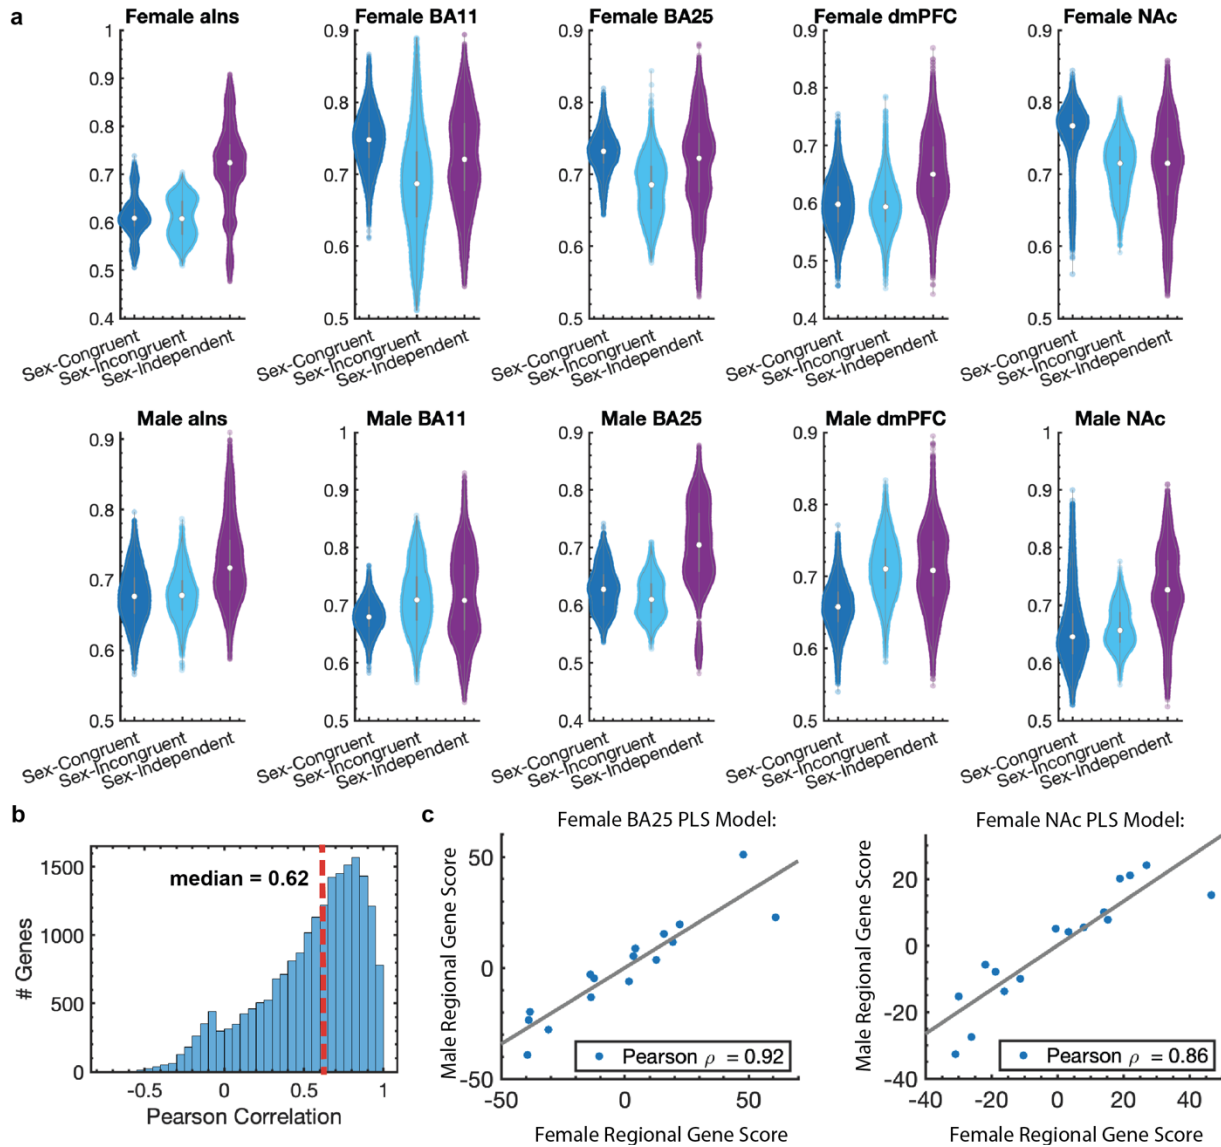

**Supplementary Figure 11. Similarities in male and female brain gene expression patterns from Brainspan data.** **a.** Brain gene expression patterns from the same sex do not explain greater variance in depression-related rsFC changes than do brain gene expression patterns from the opposite sex or both sexes. **b.** Correlation of each gene's spatial expression pattern between male and female brain gene expression matrices derived from Brainspan data. 20,287 genes were tested in total. **c.** Gene loading scores based on genes identified by PLS using Allen Human Brain Atlas are similar in male (n=4) and female (n=4) brain gene expression matrices derived from Brainspan data.

|                 | # Subjects | Mean Age $\pm$ SD | Mean HAM-D Score $\pm$ SD |
|-----------------|------------|-------------------|---------------------------|
| ThreeD Data Set |            |                   |                           |
| Depressed       | 371        | 41.9 $\pm$ 11.4   | 23.6 $\pm$ 4.4            |
| Male            | 148        | 41.9 $\pm$ 11.9   | 23.2 $\pm$ 4.8            |
| Female          | 223        | 41.9 $\pm$ 11.1   | 23.8 $\pm$ 4.3            |
| Healthy         | 85         | 35.1 $\pm$ 13.0   | N/A                       |
| Male            | 33         | 33.3 $\pm$ 12.3   | N/A                       |
| Female          | 52         | 36.2 $\pm$ 13.4   | N/A                       |
| fc1000 Data Set |            |                   |                           |
| Healthy         | 97         | 43.6 $\pm$ 16.2   | N/A                       |
| Male            | 46         | 44.0 $\pm$ 14.0   | N/A                       |
| Female          | 51         | 43.2 $\pm$ 18.1   | N/A                       |

**Supplementary Table 1: Subject Profile.** Subjects came from four scanner sites; “ThreeD” (Toronto) and three sites from the “fc1000” dataset (“ICBM”, “NewYork\_a”, and “Cleveland CCF”). Number of subjects included in rsfMRI analysis, mean age, and mean Hamilton Depression Rating Score with standard deviations are shown for subjects grouped by sex and diagnosis from each dataset.

### Supplementary References

- 1 Kang, H. J. *et al.* Spatio-temporal transcriptome of the human brain. *Nature* **478**, 483-489, doi:10.1038/nature10523 (2011).
- 2 Gershoni, M. & Pietrokovski, S. The landscape of sex-differential transcriptome and its consequent selection in human adults. *BMC Biol* **15**, 7, doi:10.1186/s12915-017-0352-z (2017).
- 3 Fulcher, B. D., Arnatkeviciute, A. & Fornito, A. Overcoming false-positive gene-category enrichment in the analysis of spatially resolved transcriptomic brain atlas data. *Nat Commun* **12**, 2669, doi:10.1038/s41467-021-22862-1 (2021).
